# Supplementary material for: Raman microscopy at the subcellular level: a study on early apoptosis in endothelial cells induced by Fas ligand and cycloheximide
Source: Royal Society of Chemistry journal article supplement (doi:10.1039/c5an02202a), 2016-01-01
Supplement: c5an02202a1.pdf [file c5an02202a1.pdf]

## Supplementary Material for Raman microscopy at the subcellular level: study on early apoptosis in endothelial cells induced by Fas ligand and cycloheximide.

K. Czamara<sup>a,b</sup>, F. Petko<sup>b</sup>, M. Baranska<sup>a,b</sup>, A. Kaczor<sup>a,b,\*</sup>

<sup>a</sup> Faculty of Chemistry, Jagiellonian University, Ingardena 3, 30-060 Krakow, Poland.

<sup>b</sup> Jagiellonian Centre for Experimental Therapeutics, Jagiellonian University, Bobrzynskiego 14, 30-348 Krakow, Poland.

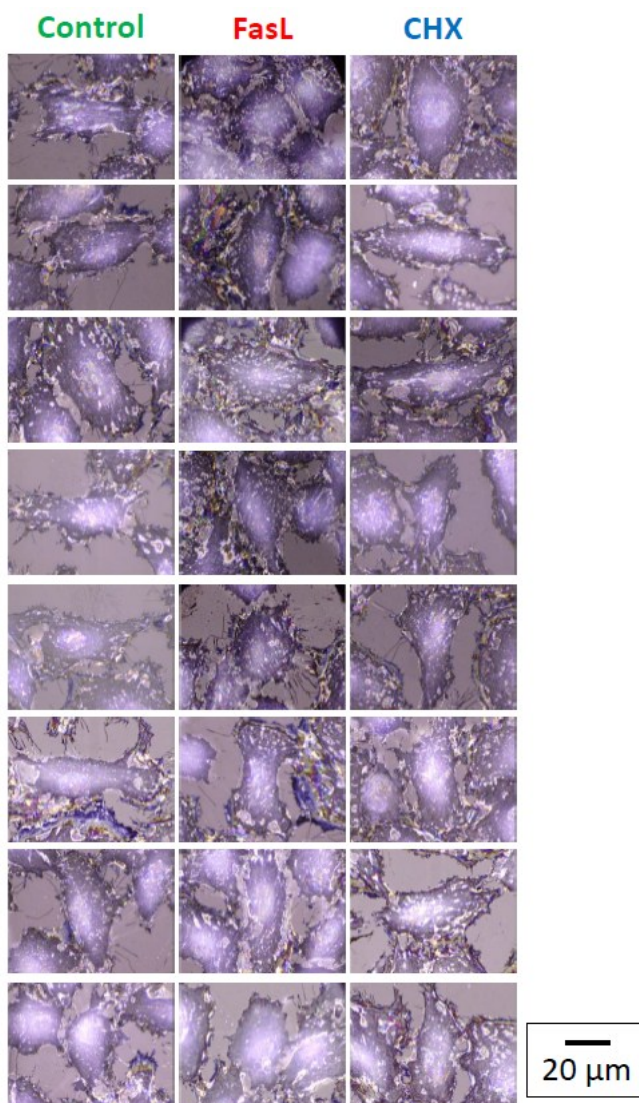

**Figure S1. Visual images of control EA.hy926 cells and EA.hy926 cells stimulated with Fas ligand and cycloheximide.** The reflected light microphotographs at 63× magnification of cells from the control, FasL and CHX groups.

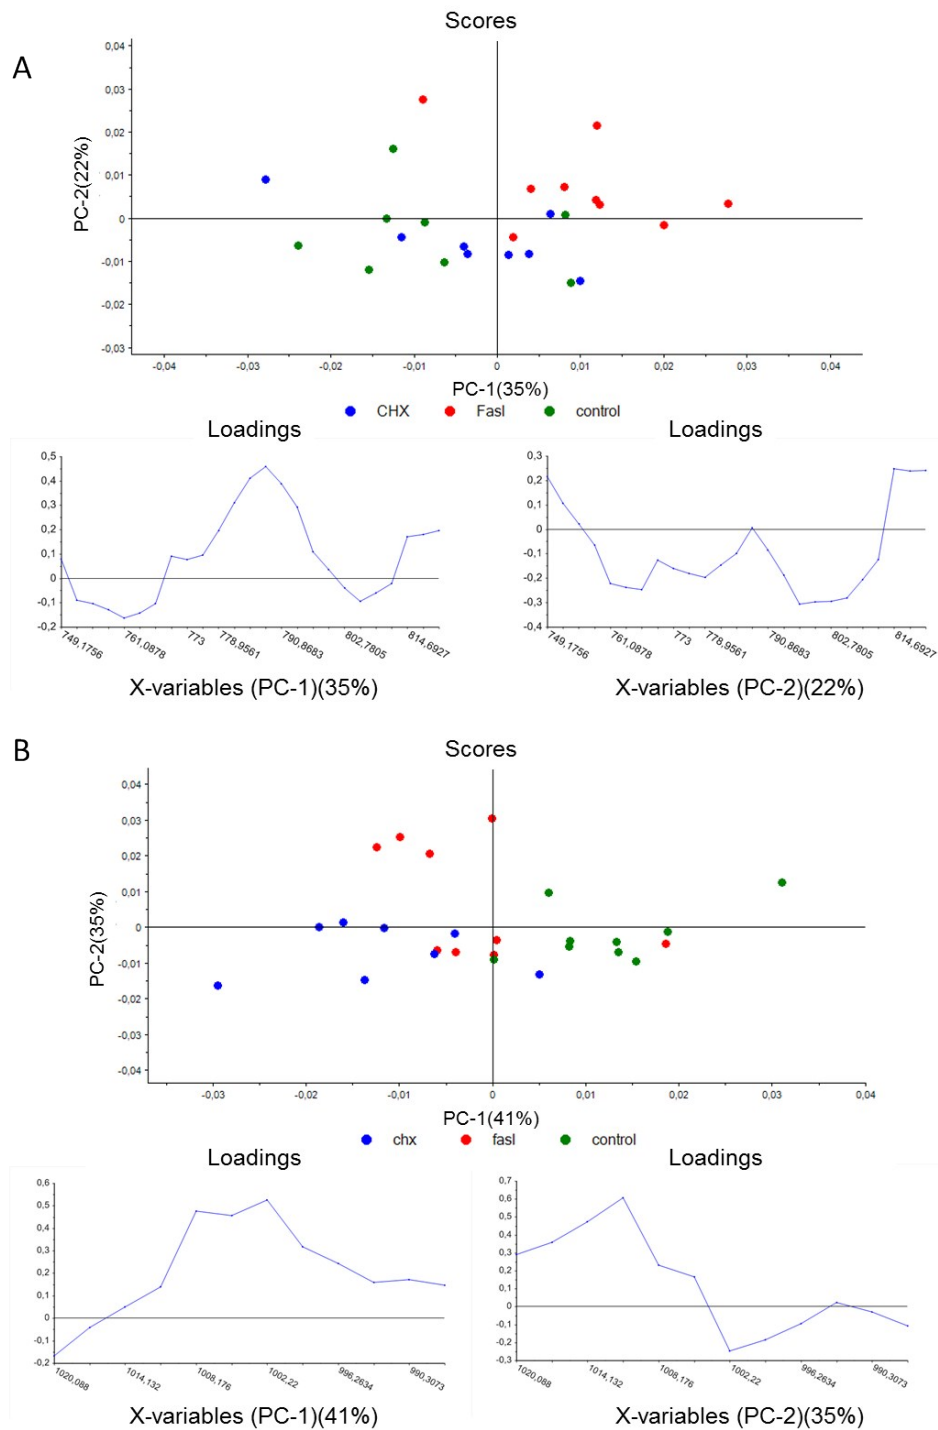

**Figure S2. The PCA analysis of control EA.hy926 cells and EA.hy926 cells stimulated with Fas ligand and cycloheximide.** The results (scores and loadings) obtained for Raman spectra averaged for nuclei in the range of 745-820  $\text{cm}^{-1}$  (A, PC1 divides control cells and stimulated with FasL, PC2 cells stimulated with FasL and cycloheximide) and for endoplasmic reticulum in the range of 985-1020  $\text{cm}^{-1}$  (B, PC1 divides control cells and stimulated with FasL and cycloheximide).

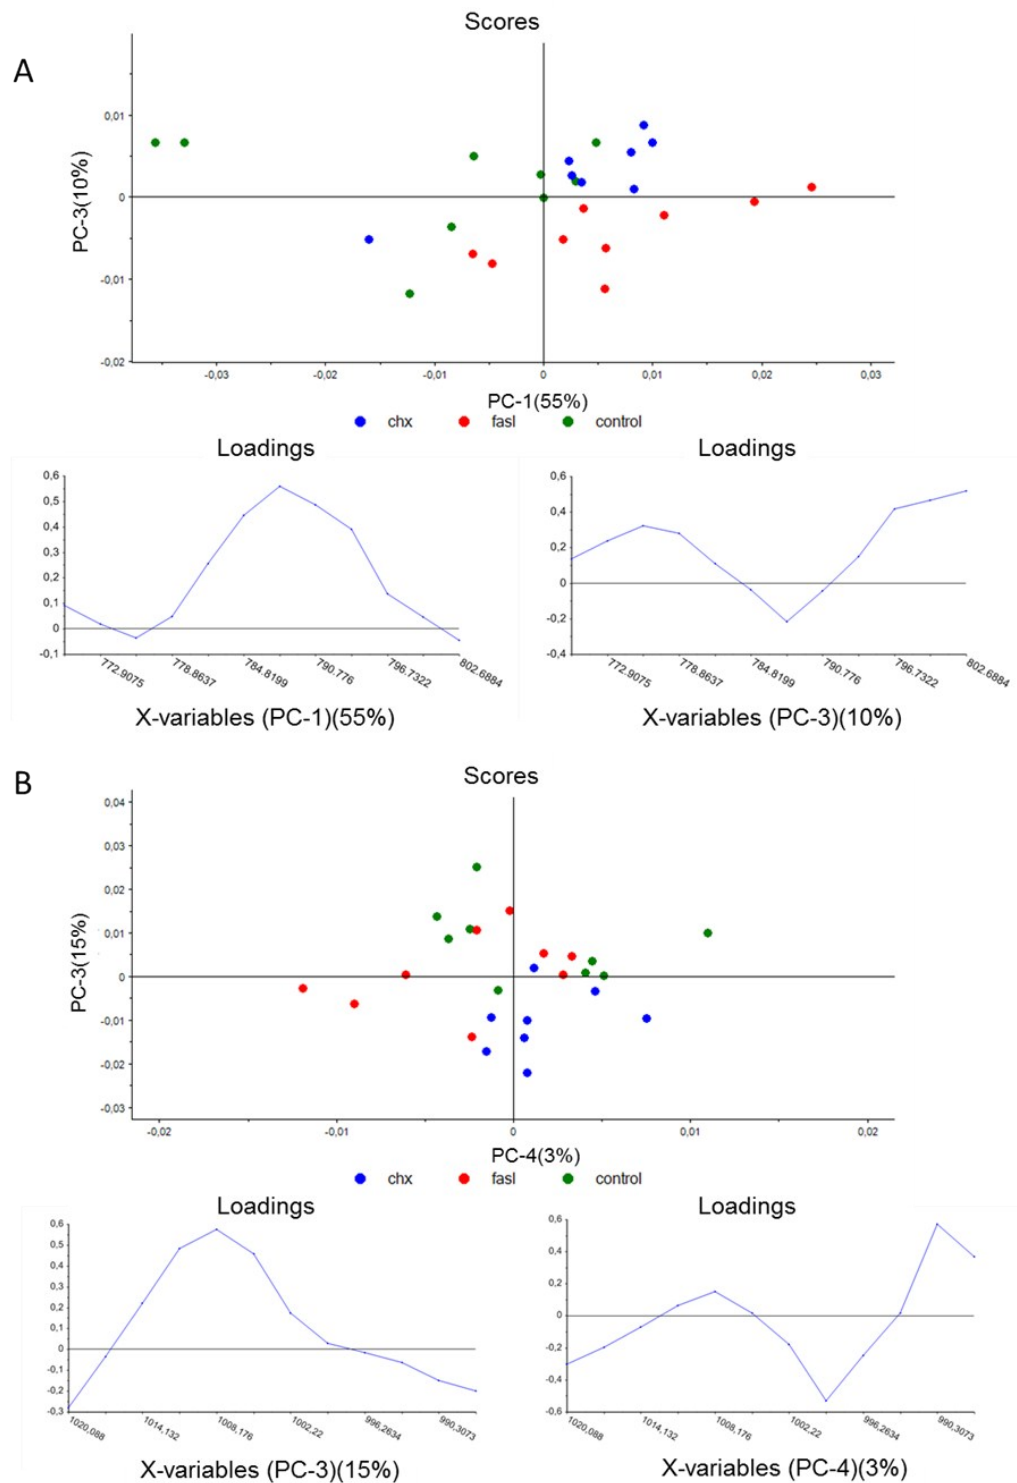

**Figure S3. The PCA analysis of control EA.hy926 cells and EA.hy926 cells stimulated with Fas ligand and cycloheximide.** The results (scores and loadings) obtained for Raman spectra averaged over entire cells in the range of 745-820  $\text{cm}^{-1}$  (A) and 985-1020  $\text{cm}^{-1}$  (B).
